# Supplementary material for: Effect of sex differences on prognosis of intravenous thrombolysis: data from the Thrombolysis Implementation and Monitor of Acute Ischemic Stroke in China (TIMS-China)
Source: PubMed Central journal article supplement — Stroke Vasc Neurol. 2020 Jul 8;6(1):10–5. doi: 10.1136/svn-2020-000351 (PMC8005908; doi:10.1136/svn-2020-000351), 2020-07-08
Supplement: svn-2020-000351supp001.pdf [file svn-2020-000351supp001.pdf]

## **Supplemental Material**

**Effect of sex differences on prognosis of intravenous thrombolysis: Data from the Thrombolysis Implementation and Monitor of Acute Ischemic Stroke in China (TIMS-China)**

**Table 1 Poor Functional Outcome after Intravenous Thrombolysis in Women Versus Men According to Age Category (starting age at 40)**

|                 | Women, n (%) | Men, n (%) | mRS Score of<br>3–6 Unadjusted<br>OR (95% CI) | P Value | Interaction<br>P Values |
|-----------------|--------------|------------|-----------------------------------------------|---------|-------------------------|
| Age < 40y       | 3(37.5)      | 2(7.14)    | 7.80(1.03-59.33)                              | 0.05    | 0.26                    |
| 40y ≤ Age < 50y | 14(34.2)     | 29(26.1)   | 1.47(0.68-3.17)                               | 0.33    |                         |
| 50y ≤ Age < 60y | 35(37.6)     | 78(31.0)   | 1.35(0.82-2.21)                               | 0.24    |                         |
| 60y ≤ Age < 70y | 53(42.4)     | 102(40.2)  | 1.10(0.71-1.69)                               | 0.68    |                         |
| 70y ≤ Age < 80y | 119(51.5)    | 111(50.2)  | 1.05(0.73-1.52)                               | 0.78    |                         |
| Age ≥ 80y       | 19(61.3)     | 5(33.3)    | 3.17(0.87-11.55)                              | 0.08    |                         |

CI indicates confidence interval; mRS modified Rankin Scale

**Table 2 Poor Functional Outcome After Intravenous Thrombolysis in Women Versus Men According to Age Category (starting age at 45)**

|                 | Women n (%) | Men n (%) | mRS Score of<br>3–6 Unadjusted<br>OR (95% CI) | P Value | Interaction<br>P Values |
|-----------------|-------------|-----------|-----------------------------------------------|---------|-------------------------|
| Age < 45y       | 8(33.3)     | 13(19.4)  | 2.08(0.73-5.89)                               | 0.17    | 0.44                    |
| 45y ≤ Age < 55y | 22(36.7)    | 48(26.0)  | 1.65(0.89-3.07)                               | 0.11    |                         |
| 55y ≤ Age < 65y | 44(38.6)    | 98(35.9)  | 1.12(0.72-1.76)                               | 0.62    |                         |
| 65y ≤ Age < 75y | 95(48.2)    | 117(46.6) | 0.94(0.65-1.36)                               | 0.73    |                         |
| 75y ≤ Age < 80y | 55(53.4)    | 46(51.1)  | 1.10(0.62-1.93)                               | 0.75    |                         |
| Age ≥ 80y       | 19(61.3)    | 5(33.3)   | 3.17(0.87-11.55)                              | 0.08    |                         |

CI indicates confidence interval; mRS modified Rankin Scale

**Table 3 Poor Functional Outcome After Intravenous Thrombolysis in Women Versus Men According to Age Category (starting age at 50)**

|                 | Women n (%) | Men n (%) | mRS Score of<br>3–6 Unadjusted<br>OR (95% CI) | P Value | Interaction<br>P Values |
|-----------------|-------------|-----------|-----------------------------------------------|---------|-------------------------|
| Age < 50y       | 17(34.7)    | 31(22.3)  | 1.85 (0.91-3.77)                              | 0.09    | 0.36                    |
| 50y ≤ Age < 60y | 35(37.6)    | 78(31.0)  | 1.35(0.82-2.21)                               | 0.24    |                         |
| 60y ≤ Age < 70y | 53(42.4)    | 102(40.2) | 1.10(0.71-1.69)                               | 0.68    |                         |
| 70y ≤ Age < 80y | 119(51.5)   | 111(50.2) | 1.05(0.73-1.52)                               | 0.78    |                         |
| Age ≥ 80y       | 19(61.3)    | 5(33.3)   | 3.17(0.87-11.55)                              | 0.08    |                         |

CI indicates confidence interval; mRS modified Rankin Scale
